# Supplementary material for: Vacuum-dried flexible hydrophobic aerogels using bridged methylsiloxane as reinforcement: performance regulation with alkylorthosilicate or alkyltrimethoxysilane co-precursors
Source: Royal Society of Chemistry journal article supplement (doi:10.1039/c8nj04038a), 2018-12-24
Supplement: c8nj04038a2.pdf [file c8nj04038a2.pdf]

## Supporting Information

# Vacuum dried flexible hydrophobic aerogels using bridged methylsiloxane as reinforcement : performance regulation with alkylorthosilicate or alkyltrimethoxysilane co-precursors

Dangjia Chen,<sup>a</sup> Keyi Dong,<sup>b</sup> Hongyi Gao,<sup>\*a</sup> Tao Zhuang,<sup>a</sup> Xiubing Huang<sup>a</sup> and Ge Wang<sup>\*a</sup>

<sup>a</sup> Beijing Advanced Innovation Center for Materials Genome Engineering, Beijing Key Laboratory of Function Materials for Molecule & Structure Construction, School of Materials Science and Engineering, University of Science and Technology Beijing, Beijing 100083, PR China.

<sup>b</sup> Beijing National Day School, Beijing 100039, PR China.

\*Corresponding author at: No. 30, Xueyuan Road, Haidian District, Beijing City, PR China.

\*E-mail: gewang@mater.ustb.edu.cn. (G. Wang)

\*E-mail: hygao2009@163.com (H. Y. Gao)

Table S1. The detailed formulas of the products.

| sample | APDEMS<br>(mmol) | TPAL<br>(mmol) | TMOS<br>(mmol) | TEOS<br>(mmol) | MTMS<br>(mmol) | PTMS<br>(mmol) | HTMS<br>(mmol) | EtOH<br>(ml) | Water<br>(ml) |
|--------|------------------|----------------|----------------|----------------|----------------|----------------|----------------|--------------|---------------|
| DT     | 12.81            | 6.39           | 0              | 0              | 0              | 0              | 0              | 18           | 2             |
| DT-Q-M | 4.27             | 2.13           | 8.54           | 0              | 0              | 0              | 0              | 18           | 2             |
| DT-Q-E | 4.27             | 2.13           | 0              | 8.54           | 0              | 0              | 0              | 18           | 2             |
| DT-T-M | 4.27             | 2.13           | 0              | 0              | 8.54           | 0              | 0              | 18           | 2             |
| DT-T-P | 4.27             | 2.13           | 0              | 0              | 0              | 8.54           | 0              | 18           | 2             |
| DT-T-H | 4.27             | 2.13           | 0              | 0              | 0              | 0              | 8.54           | 18           | 2             |

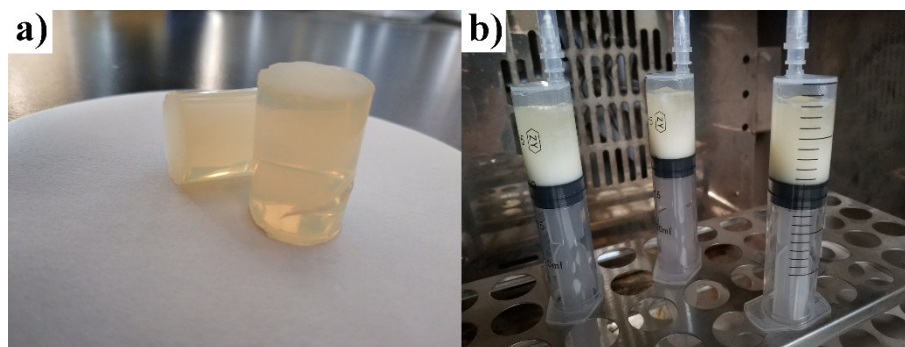

Figure S1. DT-Q-M in drying process (a), DT-T-H in sol-gel process (b).

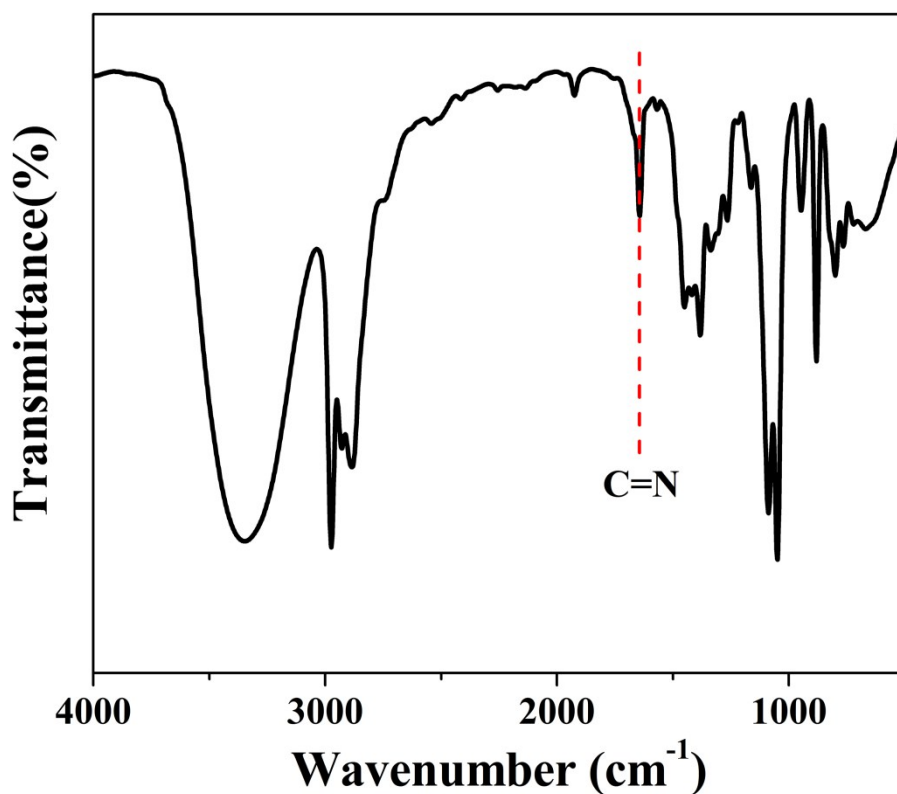

Figure S2. The FT-IR spectrum of the BMSQ precursor, in the synthesis of the aerogel, the mixture of ethanol, TPAL and ATDEMS was measured by the FT-IR before water was added, the generation of the imine and the disappearance of the aldehyde group means the precursor was synthesized.

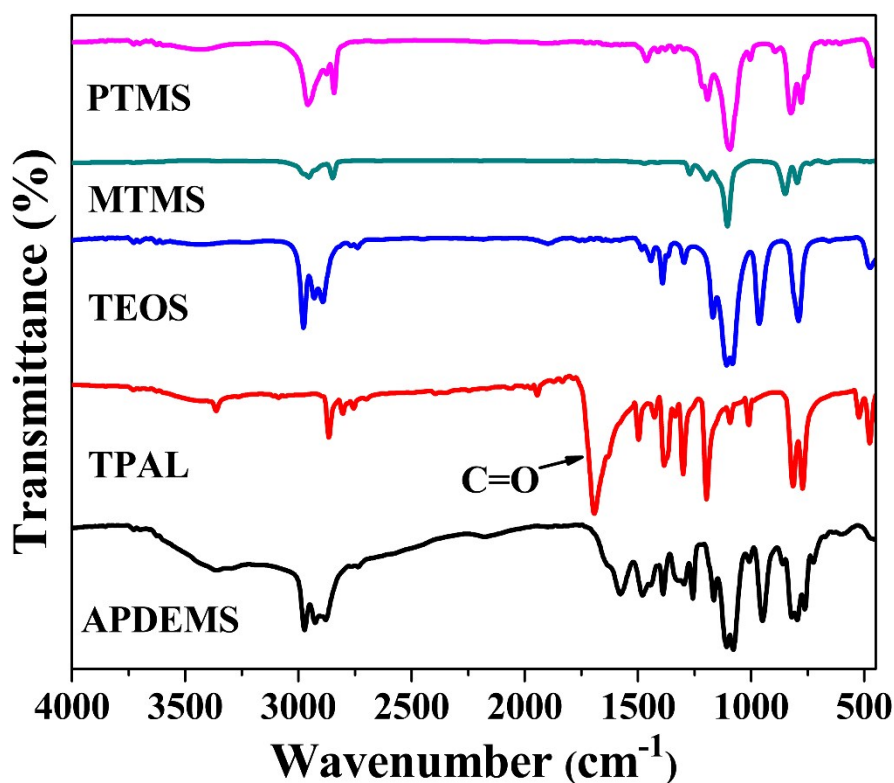

Figure S3. The FT-IR spectra of the start monomers.

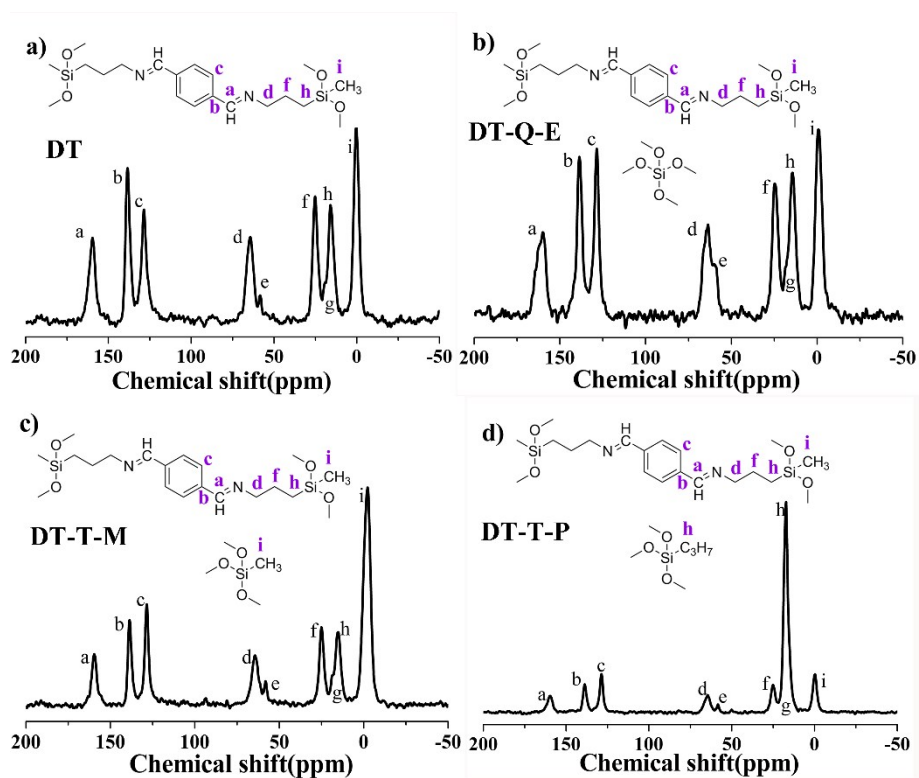

Figure S4. The Solid-state  $^{13}\text{C}$  NMR spectra of the aerogels.

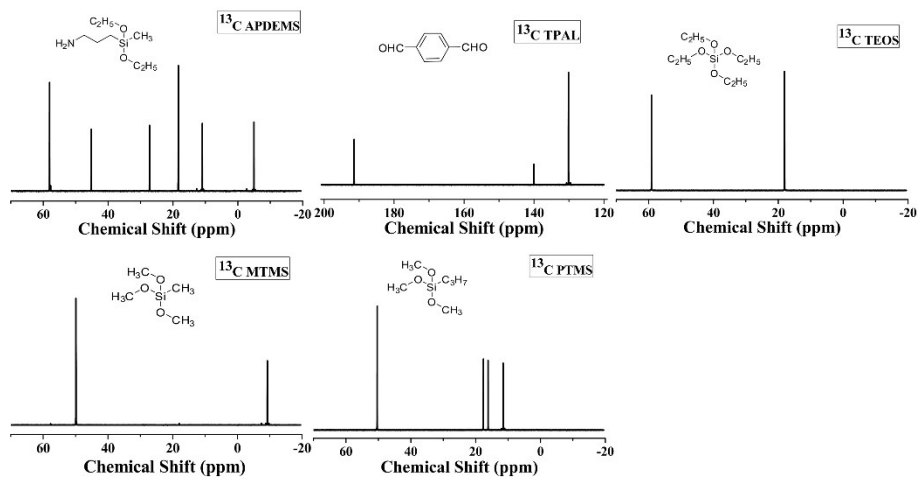

Figure S5. The  $^{13}\text{C}$  NMR spectra of the start monomers.

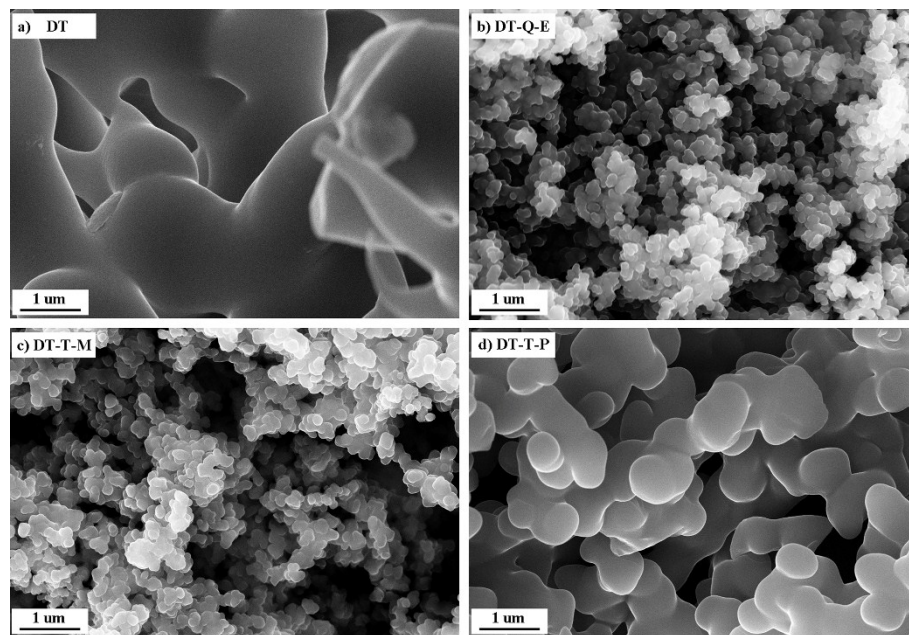

Figure S6. The SEM images of the aerogels with 40000 times magnification.

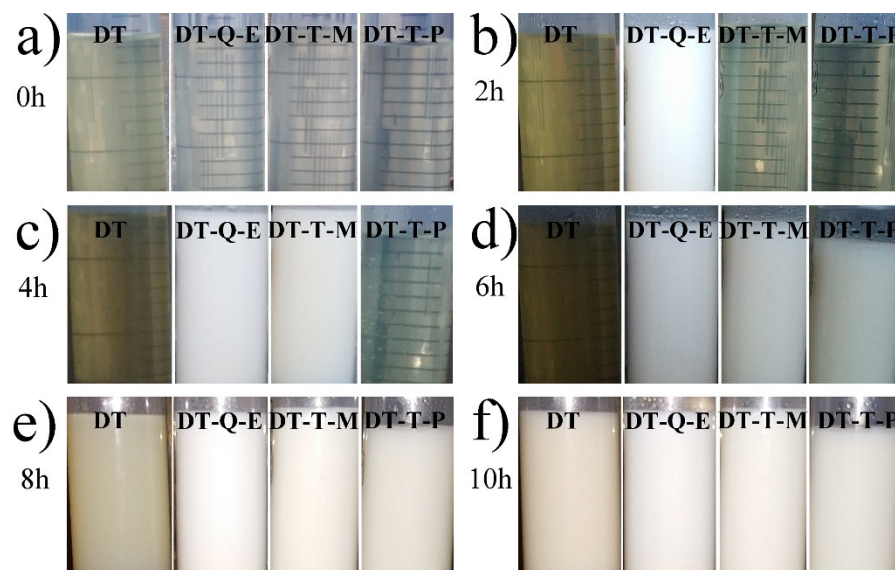

Figure S7. Photos of the sol-gel process of the samples in every 2 hours.

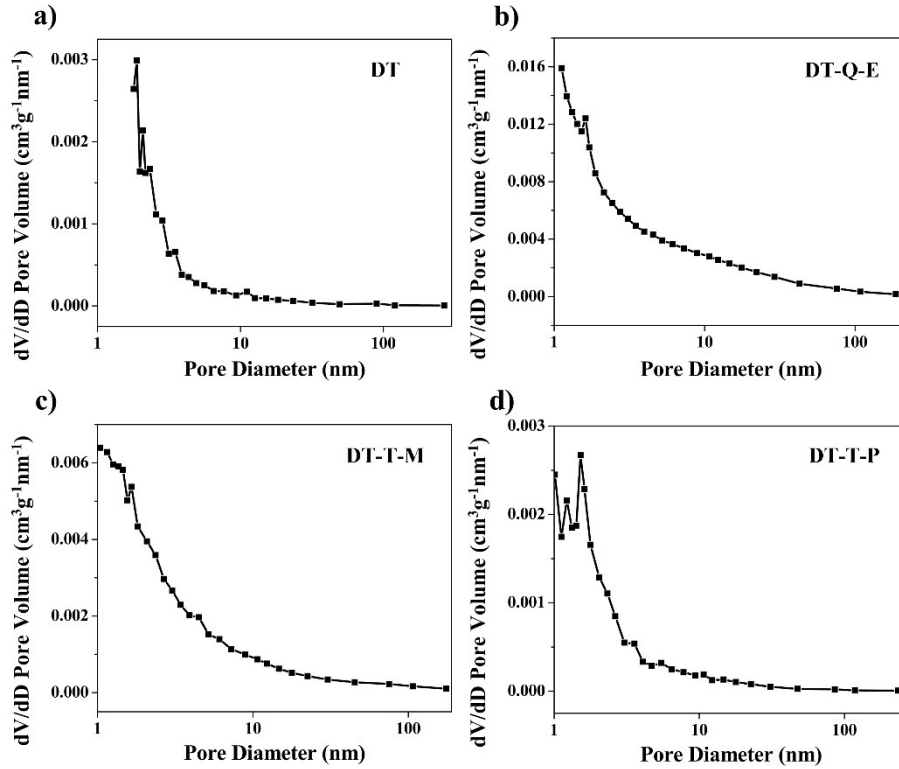

Figure S8. Pore size distribution of the aerogels, a) DT, b) DT-Q-E, c) DT-T-M, d) DT-T-P.

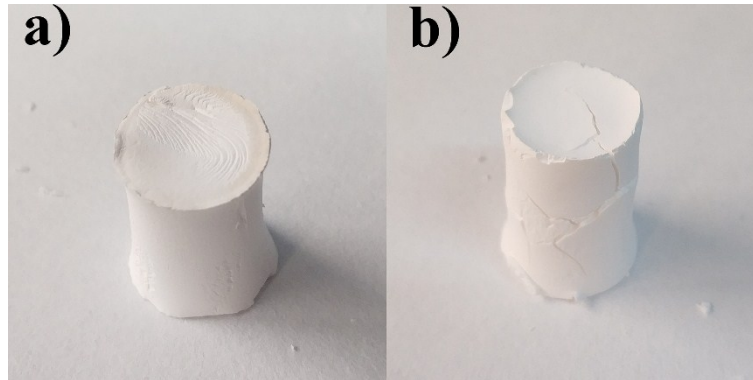

Figure S9. The optical images of aerogels, a) DT-T-3M, b) DT-Q-3E.

To improve the specific surface areas, the content of MTMS and TEOS was increased by 3 times as the content in DT-T-M and DT-Q-E individually, the two kind aerogels were named DT-T-3M and DT-Q-3E. DT-T-3M and DT-Q-3E both suffered larger shrinkage and even fragmentation, the specific surface area of DT-T-3M and DT-Q-3E are 69.88 and 265.41  $\text{m}^2/\text{g}$ , and the shrinkage of DT-T-3M and DT-Q-3E are 33.7% and 27.9% individually.

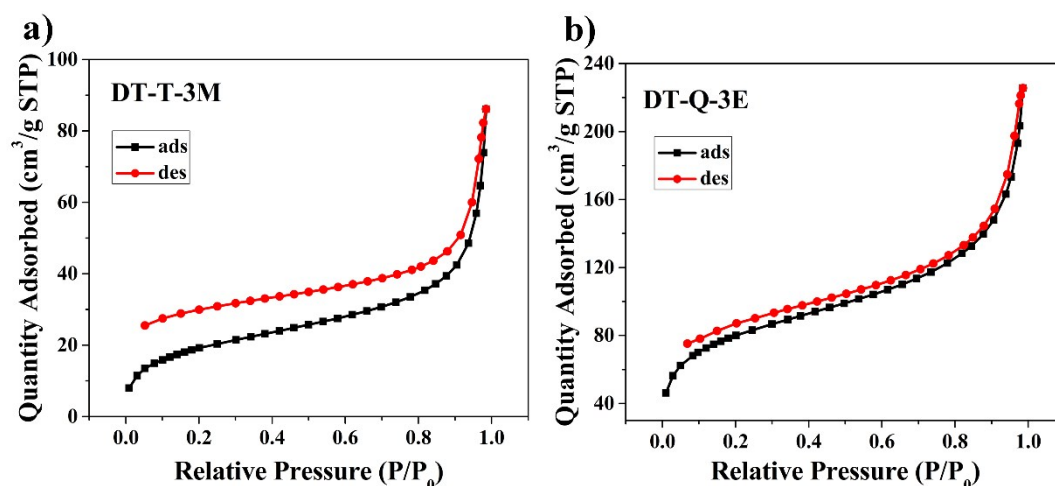

Figure S10. The Nitrogen adsorption and desorption isotherms of a) DT-T-3M and b) DT-Q-3E.

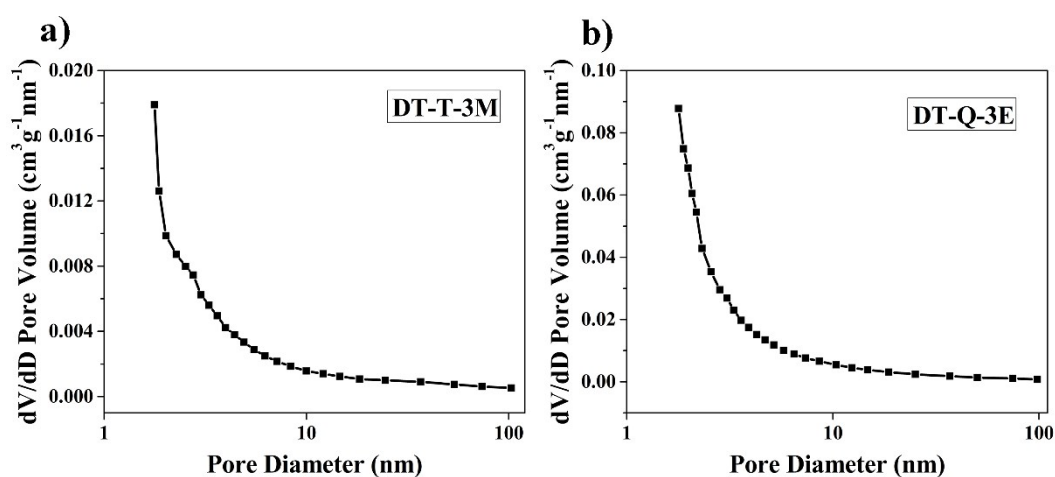

Figure S11. Pore size distribution of the aerogels, a) DT-T-3M, b) DT-Q-3E.

Table R1. A comparison of the removal rate and separation efficiency of aerogel in this work and the rate of materials reported in previous works.

| Material           | Removal rate ( $L \cdot m^{-2} \cdot s^{-1}$ ) | Separation efficiency | Reference |
|--------------------|------------------------------------------------|-----------------------|-----------|
| mesh               | 20                                             | 93%                   | 1         |
| mesh               | 15                                             | 96%                   | 2         |
| membrane           | 0.13                                           | 99%                   | 3         |
| membrane           | 0.09                                           | 100%                  | 4         |
| Aerogel (monolith) | 0.18                                           | 99%                   | This work |

Reference 1: J. Li, L. Yan, H. Li, J. Li, F. Zha and Z. Lei, RSC Adv., 2015, 5, 53802;

Reference 2: J. Li, L. Yan, H. Li, W. Li, F. Zha and Z. Lei, J. Mater. Chem. A, 2015, 3, 14696;

Reference 3: X. Gao, L. Xu, Z. Xue, L. Feng, J. Peng, Y. Wen, S. Wang, and X. Zhang, Adv. Mater., 2014, 26, 1771;

Reference 4: M. Obaid, N. A. M. Barakat, O.A. Fadali, M. Motlak, A. A. Almajid and

K. A. Khalil, Chem. Eng. J., 2015, 259, 449.
